# Supplementary material
Source: publisher figshare collection journal article supplement (https://acs.figshare.com/ndownloader/files/4508287)
Supplement: Supplementary file 1 [file 4508287]

HEADER
HETATM    1  C     2     2       0.842   2.918  -2.309
HETATM    2  C     2     2       0.044   3.124  -1.025
HETATM    3  O     2     2       0.907   2.583   0.062
HETATM    4  C     2     2       0.304   1.791   1.002
HETATM    5  O     2     2      -0.889   1.913   1.323
HETATM    6  C     2     2       1.253   0.841   1.639
HETATM    7  C     2     2       2.356   0.498   0.957
HETATM    8  C     2     2       3.420  -0.500   1.326
HETATM    9  C     2     2       3.730  -1.486   0.151
HETATM   10  C     2     2       2.870  -2.789   0.141
HETATM   11  C     2     2       1.769  -2.801  -0.962
HETATM   12  C     2     2       0.659  -1.823  -0.755
HETATM   13  N     2     2       0.700  -0.617  -1.290
HETATM   14  O     2     2       1.781  -0.167  -1.978
HETATM   15  C     2     2       0.769   0.270   2.952
HETATM   16  O     2     2      -0.377   0.235  -1.128
HETATM   17  N     2     2      -2.699  -1.076  -0.838
HETATM   18  C     2     2      -3.617  -0.635   0.036
HETATM   19  S     2     2      -5.226  -1.365   0.159
HETATM   20  N     2     2      -3.279   0.398   0.837
HETATM   21  H     2     2      -0.233  -2.071  -0.200
HETATM   22  H     2     2       1.346  -3.815  -1.012
HETATM   23  H     2     2       2.242  -2.567  -1.923
HETATM   24  H     2     2       2.404  -2.943   1.123
HETATM   25  H     2     2       3.531  -3.650  -0.040
HETATM   26  H     2     2       4.791  -1.762   0.208
HETATM   27  H     2     2       3.548  -0.959  -0.790
HETATM   28  H     2     2       3.170  -1.057   2.237
HETATM   29  H     2     2       4.342   0.067   1.539
HETATM   30  H     2     2       2.472   0.932  -0.030
HETATM   31  H     2     2      -0.159   4.176  -0.801
HETATM   32  H     2     2      -0.881   2.550  -1.038
HETATM   33  H     2     2       0.255   3.246  -3.176
HETATM   34  H     2     2       1.065   1.847  -2.383
HETATM   35  H     2     2       1.777   3.488  -2.274
HETATM   36  H     2     2       1.363  -0.595   3.260
HETATM   37  H     2     2       0.814   1.025   3.749
HETATM   38  H     2     2      -0.278  -0.029   2.845
HETATM   39  H     2     2      -1.762  -0.592  -0.975
HETATM   40  H     2     2      -2.981  -1.845  -1.434
HETATM   41  H     2     2      -2.356   0.850   0.851
HETATM   42  H     2     2      -3.992   0.733   1.473
